# Supplementary material
Source: publisher figshare collection journal article supplement (https://acs.figshare.com/ndownloader/files/17367911)
Supplement: Supplementary file 1 [file 17367911]

## **Supporting Information**

### **Surface grafting polyphosphoesters on cellulose nanocrystals to improve the emulsification efficacy**

Suphatra Hiranphinyophat<sup>1</sup>, Yuta Asaumi<sup>2</sup>, Syuji Fujii<sup>3,4</sup>, Yasuhiko Iwasaki<sup>\*5,6</sup>

<sup>1</sup>Graduate School of Science and Engineering, Kansai University, 3-3-35 Yamate-cho, Suita-shi, Osaka, 564-0836, Japan

<sup>2</sup>Graduate School of Engineering, Osaka Institute of Technology, 5-16-1 Omiya, Asahi-ku, Osaka 535-8585, Japan

<sup>3</sup>Faculty of Engineering, Osaka Institute of Technology, 5-16-1 Omiya, Asahi-ku, Osaka 535-8585, Japan

<sup>4</sup>Nanomaterials Microdevices Research Center, Osaka Institute of Technology, 5-16-1 Omiya, Asahi-ku, Osaka 535-8585, Japan

<sup>5</sup>Faculty of Chemistry, Materials and Bioengineering, Kansai University, 3-3-35 Yamate-cho, Suita-shi, Osaka, 564-0836, Japan

<sup>6</sup>ORDIST, Kansai University, 3-3-35 Yamate-cho, Suita-shi, Osaka, 564-0836, Japan

Tel: +81-6-6368-0090, Fax: +81-6-6368-0090, E-mail: yasu.bmt@kansai-u.ac.jp

\*Corresponding author

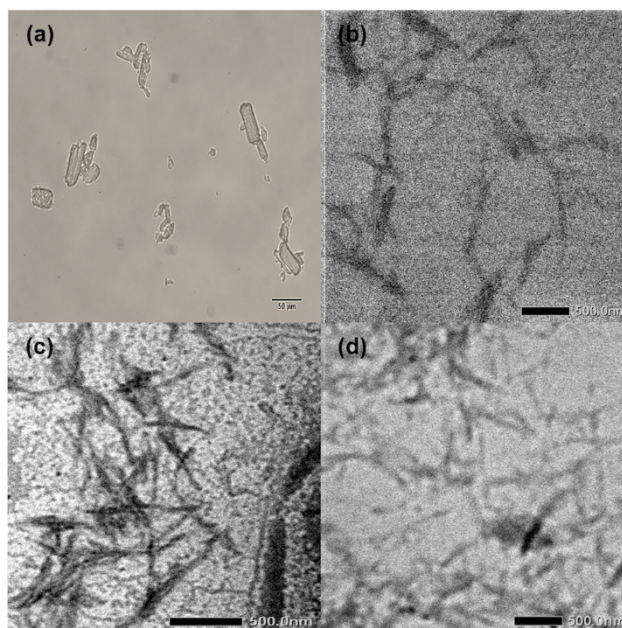

**Figure S1** (a) Optical micrograph of microcrystalline cellulose (scale bar is 50  $\mu\text{m}$ ) and (b–d) transmission electron micrographs of cellulose nanocrystals prepared by HCl treatment for different reaction times: (b) 8, (c) 12, and (d) 16 h (scale bars are 500 nm).

**Table S1** Reaction conditions and diameter sizes of cellulose nanocrystals after acid treatment.

| Sample              | Reaction time (h) | TEM images           |                        | DLS                |       |
|---------------------|-------------------|----------------------|------------------------|--------------------|-------|
|                     |                   | Diameter size (nm)   | Length (nm)            | Diameter size (nm) | PDI   |
| MCC                 | 0                 | 20 ( $\mu\text{m}$ ) | 30.4 ( $\mu\text{m}$ ) | -                  | -     |
| CNCs                | 8                 | 40.6 $\pm$ 8.7       | 344.3 $\pm$ 93.2       | -                  | -     |
| CNCs                | 12                | 33.9 $\pm$ 4.8       | 321.0 $\pm$ 45.5       | -                  | -     |
| CNCs                | 16                | 22.1 $\pm$ 7.3       | 250.7 $\pm$ 62.4       | -                  | -     |
| CNC- <i>g</i> -PIPP | -                 | 76.9 $\pm$ 11.2      | 242.0 $\pm$ 32.4       | 571.5              | 0.525 |

**Table S2** Polymerization conditions of IPP in the presence of CNCs and molecular weights of free PIPP homopolymer in CNC-g-PIPP.

| Sample ID | IPP monomer (mmol) | CNCs initiator (mmol) | Monomer conversion (%) | Grafting yield (%) | Mn <sup>a</sup> (kDa) | Mn <sup>b</sup> (kDa) | M <sub>w</sub> /M <sub>n</sub> |
|-----------|--------------------|-----------------------|------------------------|--------------------|-----------------------|-----------------------|--------------------------------|
| 1         | 6                  | 0.06                  | 46.5                   | 8.4                | 17.9                  | 17.2                  | 1.28                           |
| 2         | 15                 | 0.06                  | 68.2                   | 156.7              | 34.8                  | 19.3                  | 1.22                           |
| 3         | 33                 | 0.06                  | 30.6                   | 113.7              | 41.6                  | 24.6                  | 2.46                           |
| 4         | 33                 | 0.30                  | 70.1                   | 64.2               | 34.9                  | 11.8                  | 1.21                           |

<sup>a</sup> Estimated by proton nuclear magnetic resonance.

<sup>b</sup> Determined by gel permeation chromatography.

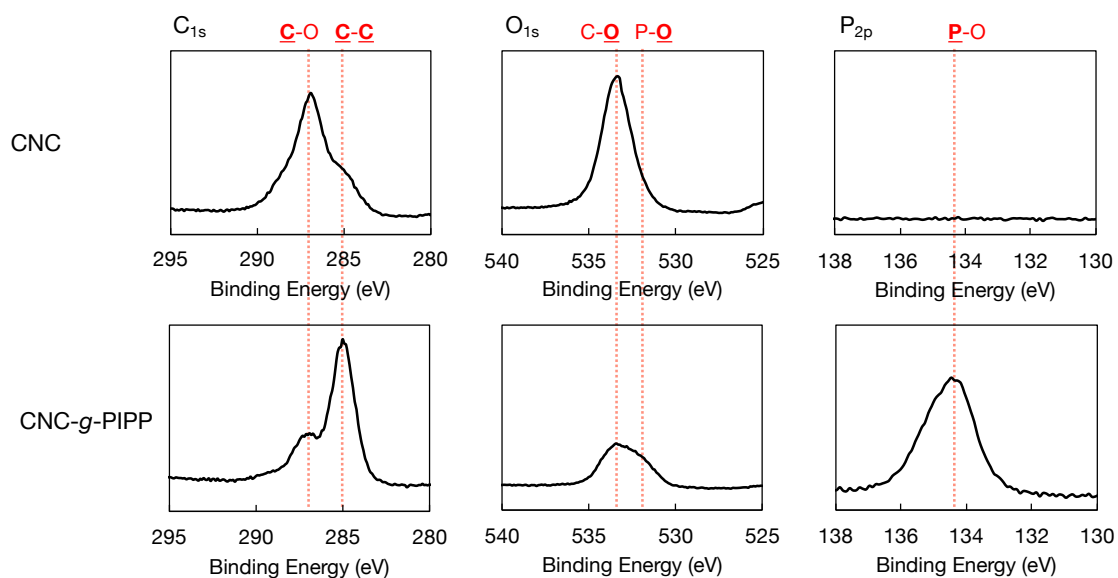

**Figure S2** XPS spectra of pristine CNC and CNC-g-PIPP.

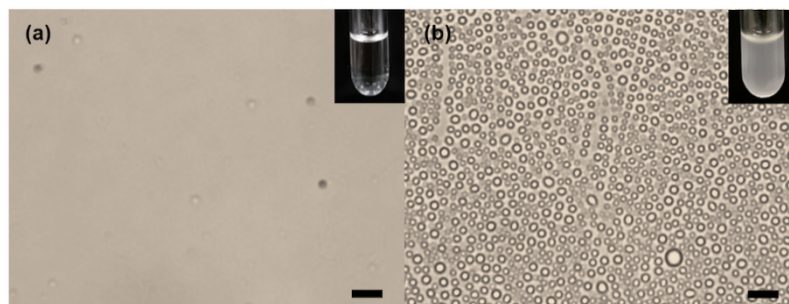

**Figure S3** Phase-contrast micrographs of aqueous CNC-*g*-PIPP solutions prepared at (a) 4°C and (b) at 45°C (scale bar are 1 μm).

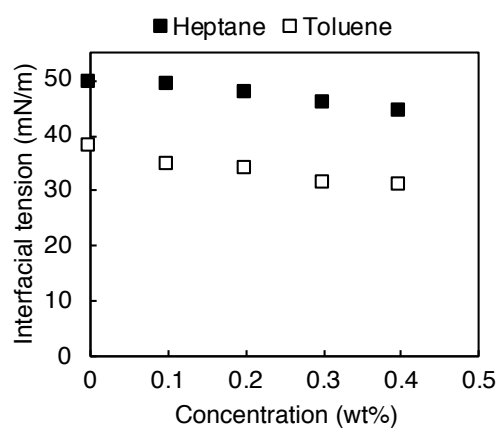

**Figure S4** Interfacial tensions of toluene/water and heptane/water as functions of the concentration of unmodified CNCs at 4°C.

The percentage of CNC-g-PIPP nanoparticles effectively adsorbed to the oil–water interface were calculated based on the total amount of nanoparticles added by using the following equation:<sup>1</sup>

$$\begin{aligned}
 \% \text{Particles} &= \frac{\text{Total number of partocles adsorbed at droplet surface}}{\text{Total number of partles added}} \times 100\% \\
 &= \frac{\text{Total surface area of droplets} / \text{Total surface area of one particle}}{\text{Total volume of particles added} / \text{Total volume of one particle}} \times 100\% \\
 &= \frac{(N_{oil} \times 4\pi R_{oil}^2) / R_{part}^2}{V_{part} / \frac{4}{3}\pi R_{part}^3} \times 100\% \\
 &= 4\pi \frac{R_{oil}^2 N_{oil}}{N_{part} R_{part}^2} \times 100\% \tag{S1}
 \end{aligned}$$

where

$$N_{oil} = \frac{3V_{oil}}{4\pi R_{oil}^3} \quad \text{and} \quad N_{part} = \frac{3V_{part}}{4\pi R_{part}^3}$$

where  $R_{oil}$  and  $R_{part}$  are the radii of oil droplets and CNC-g-PIPP particles ( $R_{oil}$  was taken to be the volume-average radius as determined by the laser diffraction and  $R_{part}$  was taken to be the particle dimension as determined by DLS measurement (Table S1)), assuming that the modified CNCs were also spherical in shape;  $N_{oil}$  and  $N_{part}$  are the numbers of oil droplets and CNC-g-PIPP particles (determined from the mean radius of the particles as determined by TEM images (Table S1)); and  $V_{oil}$  and  $V_{part}$  are volumes of oil and particles. However, such calculation requires an assumption to be made regarding the particle-packing efficiency at the interface. Here it is assumed that there is two-dimensional square

lateral packing, the CNC-g-PIPP nanoparticles are uniform, and that the sizes of the emulsion droplets and CNC-g-PIPP nanoparticles are negligible as compared with those of the oil droplets. It is also assumed that no nanoparticles appear in the oil phase due to the high energy barrier for the nanoparticles to enter the oil phase.

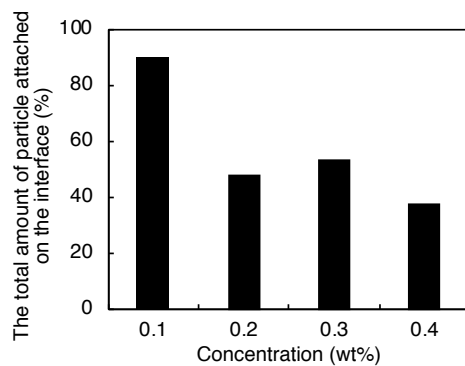

**Figure S5** Percentage of CNC-g-PIPP nanoparticles attached to the oil–water interface as a function of the concentration.

**Table S3** Microscopy images of heptane and toluene emulsions stabilized by 0.4 wt% CNC-g-PIPP after different storage times. Scale bars are 20  $\mu\text{m}$ .

| Sample/Time<br>(min)  | 0                                                                                   | 2                                                                                   | 4                                                                                   | 10                                                                                   | 15                                                                                    |
|-----------------------|-------------------------------------------------------------------------------------|-------------------------------------------------------------------------------------|-------------------------------------------------------------------------------------|--------------------------------------------------------------------------------------|---------------------------------------------------------------------------------------|
| Heptane-<br>emulsions | 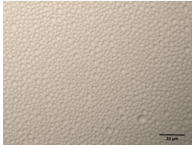 |  |  |  |  |
| Toluene-<br>emulsions |  |  |  |  |  |

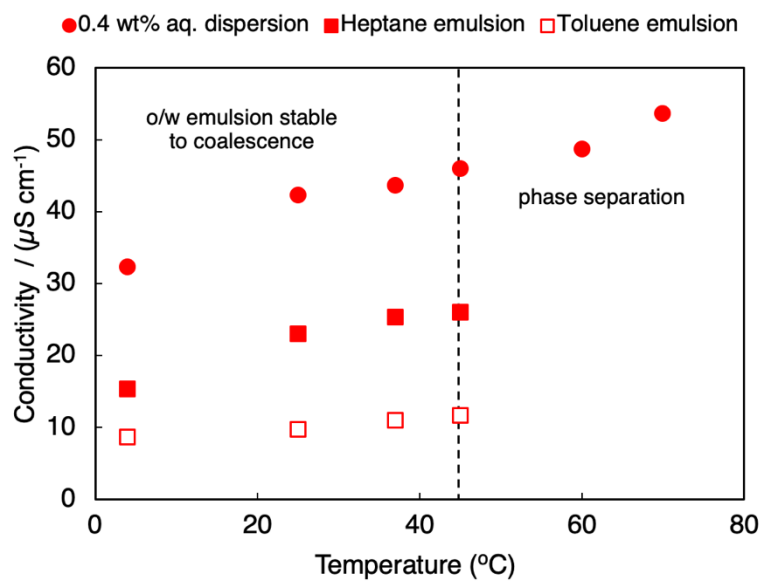

**Figure S6** Conductivities of 0.4 wt% CNC-g-PIPP aqueous dispersions and O/W emulsions prepared with different oils (heptane or toluene) as a function of temperature.

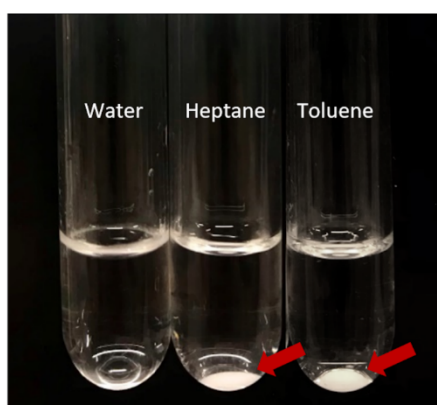

**Figure S7** Pendant drop of emulsions in distilled water, heptane, and toluene stabilized by 0.4 wt% CNC-g-PIPP.



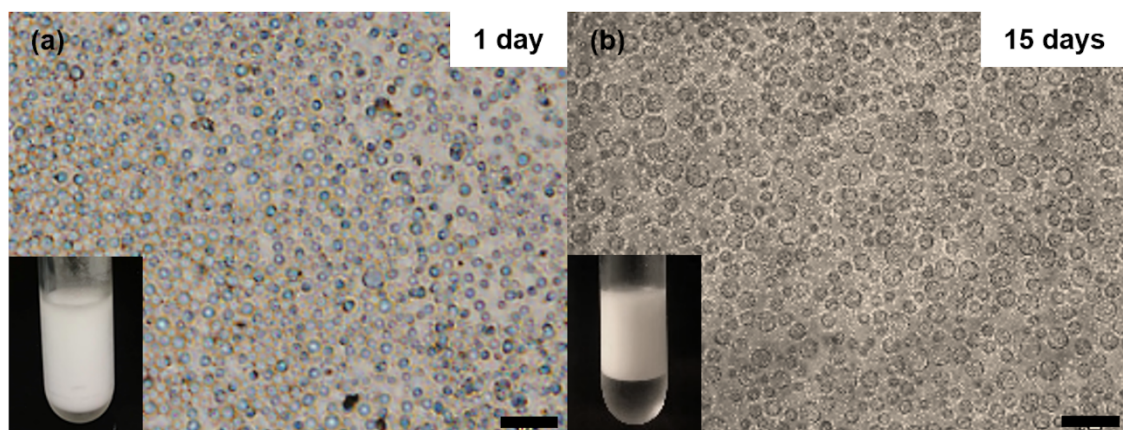

**Figure S8** Optical microscopy images of emulsions prepared with 0.4 wt% CNC-g-PIPP after storage for (a) one day and (b) 15 days. Scale bars are 20 μm.

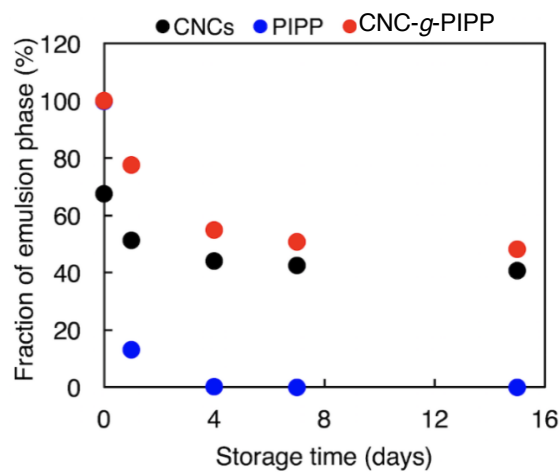

**Figure S9** Proportions of the oil-in-water emulsion phase in samples prepared with 0.4 wt% CNCs, PIPP, and CNC-g-PIPP as functions of storage time.

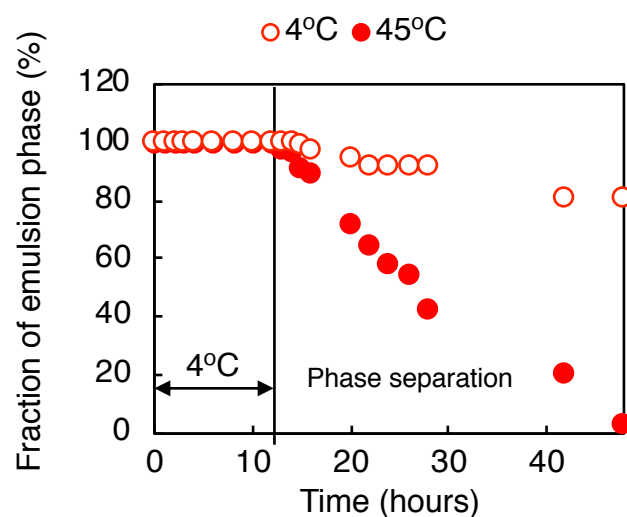

**Figure S10** Creaming profile fraction of heptane in water in a Pickering emulsion stabilized with 0.4 wt% CNC-g-PIPP at temperatures of 4°C and 45°C.

**Table S4** Partitioning behavior of modified CNCs after demulsification at different temperatures.

| Temp (°C) | Phase | Total weight of sample (g) | Weight of sample in each oil phase (g) | % Partition |
|-----------|-------|----------------------------|----------------------------------------|-------------|
| 4         | oil   | 0.015                      | 0.00037                                | 2.5         |
|           | water |                            | 0.01428                                | 97.5        |
| 45        | oil   | 0.015                      | 0.01097                                | 57.7        |
|           | water |                            | 0.00811                                | 42.3        |

## Reference

- (1) Fujii, S.; Aichi, A.; Muraoka, M.; Kishimoto, N.; Iwahori, K.; Nakamura, Y.; Yamashita, I. Ferritin as a bionano-particulate emulsifier. *J. Colloid Interface Sci.* **2009**, 338, 222-228.
